# Supplementary material
Source: MDPI journal article supplement (https://www.mdpi.com/2071-1050/10/6/1980)
Supplement: s1 [file s1]

## SUPPLEMENTARY MATERIAL

### 1. Indicators

We developed three indicators. In the main system, the *total import dependency* (TID) relates P net imports (of the P-demanding subsystems *animal husbandry*, *cultivation* and *chemical industry*) to total inputs (to these processes). We calculated the TID in each year  $a$  according to the following equation (1):

$$TID_a = \frac{\Sigma net\ imports_{agriculture_a+chemical\ industry_a}}{\Sigma input_{agriculture_a+chemical\ industry_a}} * 100\ \% \quad (1)$$

In the subsystem *cultivation*, the *P efficiency plant production* (PEP) is the amount of domestic fodder and plant-based food production in relation to fertilizer input to soils (manure, mineral fertilizer, organic recycling fertilizer, and sewage sludge) calculated in each year  $a$  according to equation (2):

$$PEP_a = \frac{\Sigma food\ and\ fodder\ production_{cultivation_a}}{\Sigma fertilizer\ input_{cultivation_a}} * 100\ \% \quad (2)$$

In the subsystem *waste management*, the *P losses waste management* (PLW) relates P losses in the waste management sector to total P inputs (to this subsystem). By ‘losses’ we refer to losses in cement plants and landfills, exported P, and P in the effluent of wastewater treatment plants. We calculated the PLW in each year  $a$  according to equation (3):

$$PLW_a = \frac{\Sigma input_{waste\ management_a} - \Sigma recycled\ output_{waste\ management_a}}{\Sigma input_{waste\ management_a}} * 100\ \% \quad (3)$$

Whereas the TID helps to assess the self-sufficiency of the overall Swiss P system, the other two indicators refer to specific points within the P management system: the PEP corresponds to P efficiency in crop farming and the PLW illustrates the efficiency of the waste management sector in terms of domestic P recycling.

### 2. Scenario assumptions

**Table S1:** Assumptions for individual P flows, stocks, and processes under the three different scenarios.

| Flow / process / stock                       | Assumption                                         | Source         |
|----------------------------------------------|----------------------------------------------------|----------------|
| <b>Scenario 1: Balanced and healthy diet</b> |                                                    |                |
| Animal-based food net imp.                   | remains unchanged                                  | own assumption |
| Plant-based food net imp.                    | remains unchanged                                  | own assumption |
| Animals net imp.                             | remains unchanged                                  | own assumption |
| Animal-based food                            | adapted to food-related factors (table 1 in paper) | [1]            |
| Plant-based food                             | adapted to food-related factors (table 1 in paper) | [1]            |
| Farmyard manure                              | adapted according to food factors FSVO (0.32 for   | [1-2]          |

|                                                       |                                                                                                           |                               |
|-------------------------------------------------------|-----------------------------------------------------------------------------------------------------------|-------------------------------|
|                                                       | animals for fattening, 1.5 for animals for milk) and livestock (Agristat, tables 3.4 and 3.7)             |                               |
| Plant-based fodder                                    | adapted to changes in farmyard manure:<br>$fodder\ new = fodder\ old * \frac{manure\ new}{manure\ old}$   | own assumption                |
| Green waste                                           | adapted to plant-based food (PBF):<br>$green\ waste\ new = green\ waste\ old * \frac{PBF\ new}{PBF\ old}$ | own assumption                |
| Municipal solid waste                                 | remains unchanged                                                                                         | own assumption                |
| Wastewater (WW) H&B                                   | adapted to total food:<br>$WW\ H\&B\ new = WW\ alt * \frac{total\ food\ new}{total\ food\ old}$           | own assumption                |
| Diffuse inputs agricultural (DIA)                     | adapted to changes in farmyard manure:<br>$DIA\ new = DIA\ old * \frac{manure\ new}{manure\ old}$         | own assumption                |
| Sewage-sludge-related flows                           | remains unchanged                                                                                         | own assumption                |
| Sub-process <i>Municipal solid waste incineration</i> | transfer coefficients unchanged                                                                           | own assumption                |
| Cleaned wastewater                                    | remains unchanged                                                                                         | own assumption                |
| Stormwater overflow                                   | remains unchanged                                                                                         | own assumption                |
| Stock <i>Cultivation</i>                              | remains unchanged                                                                                         | own assumption                |
| <b>Scenario 2: Implementation of VVEA</b>             |                                                                                                           |                               |
| Recovered P ABP                                       | new flow: $recovered\ P\ ABP = meat\ \&\ bone\ meal * 0.9$                                                | own assumption based on [3-4] |
| ABP residue                                           | new flow: $recovered\ P\ ABP = meat\ \&\ bone\ meal * 0.1$                                                | own assumption                |
| ABP to CP                                             | no incineration of ABP in cement plants                                                                   | own assumption                |
| Recovered P SS                                        | new flow: $recovered\ P\ SS = sewage\ sludge * 0.5$                                                       | own assumption based on [3-4] |
| Sewage sludge to CP                                   | adapted in proportion to sewage sludge to municipal solid waste incineration                              | own assumption                |
| Sewage sludge to MSWI                                 | adapted in proportion to sewage sludge to cement plants                                                   | own assumption                |
| Sub-process <i>Municipal solid waste incineration</i> | transfer coefficients unchanged                                                                           | own assumption                |
| Recovered P SS ash                                    | new flow: $recovered\ P\ SS\ ash = sewage\ sludge\ ash * 0.9$                                             | own assumption based on [3-4] |
| Sewage sludge export                                  | no exported sewage sludge                                                                                 | own assumption                |
| <b>Scenario 3: Urine separation</b>                   |                                                                                                           |                               |
| Urine in wastewater H&B                               | $urine\ new = urine\ old * 0.8$                                                                           | [4]                           |
| Recycling fertilizer                                  | new flow: $recycling\ fertilizer = urine\ old * 0.2$                                                      | [4]                           |
| Sub-process <i>Animal husbandry</i>                   | transfer coefficients unchanged                                                                           | own assumption                |

|                                         |                                 |                |
|-----------------------------------------|---------------------------------|----------------|
| Sub-process <i>Wastewater treatment</i> | transfer coefficients unchanged | own assumption |
| Stock <i>Cultivation</i>                | remains unchanged               | own assumption |

---

## References

- [1] FSVO (Federal Food Safety and Veterinary Office). Eating well and staying healthy. Swiss nutrition policy 2017-2024; FSVO: Bern, Switzerland, 2017.
- [2] Agristat. Statistische Erhebungen und Schätzungen über Landwirtschaft und Ernährung 2015; Schweizer Bauernverband: Brugg, Switzerland, 2016.
- [3] Spörri, A.; Erny, I.; Hermann, L.; Hermann, R. *Beurteilung von Technologien zur Phosphorrückgewinnung*. Ernst Basler + Partner AG: Zollikon, Switzerland, 2017.
- [4] Eawag. pers. communication. 2017.
